# Supplementary material
Source: MDPI journal article supplement (https://www.mdpi.com/2077-0472/11/10/935)
Supplement: s1 [file s1]

AGCCGCGGTAATTCCAGCTCCAATAGCGTATATTAAAGTTGTTGCA  
 GTTAAAAAGCTCGTAGTTGAACCTTGGGTCTGGCTGGCCGGTCCGC  
 CTCACCGCGAGTACTGGTCCGGCTGGACCTTTCTTCTGGGGAACC  
 TCATGGCCTTCACTGGCTGTGGGGGAACCAGGACTTTTACTGTGA  
 AAAAATTAGAGTGTTCAAAGCAGGCCTTTGCTCGAATACATTAGCA  
 TGAATAATAGAATAGGACGTGTGGTTCTATTTTGTGGTTTCTAGG  
 ACCGCCGTAATGATTAATAGGGATAGTCGGGGGCGTCAGTATTCAG  
 CTGTCAGAGGTGAAATTCCTGGATTGCTGAAGACTAACTACTGCG  
 AAAGCATTCCCAAGGATGTTTTATTAAATCAGGGAACGAAAGTTA  
 GGGGATCGAAGACGATCAGATACCGTCGTAGTCTTAACCATAAAC  
 TATGCCGACTAGGGATCGGACGGGATTCTATAATGACCCGTTCCGC  
 ACCTTACGAGAAATCAAAGTTTTTGGGTTCTGGGGGAGTATGGTC  
 GCAAGGCTGAACTTAAAGAAATTGACGGAAGGGCACCACAAGG  
 CGTGGAGCCTGCGGCTTAATTTGACTCA

**Figure S1.** Nucleotide sequence of the fragment of a 18S RNA gene from *Penicillium chrysogenum* F-24-28 determined using the 18S F566-18S R1200r primer system.

TGAACCTGCGGAAGGATCATTACCGAGTGAGGGCCCTCTGGGTCCA  
 ACCTCCCACCCGTGTTTATTTTACCTTGTTGCTTCGGCGGGCCCGCC  
 TTAAGTGGCCGCCGGGGGGCTTACGCCCCGGGCCCCGCGCCCGCC  
 GAAGACACCCTCGAACTCTGTCTGAAGATTGTAGTCTGAGTGAAAA  
 TATAAATTATTTAAACTTTCAACAACGGATCTCTTGGTTCCGGCAT  
 CGATGAAGAACGCAGCGAAATGCGATACGTAATGTGAATTGCAAA  
 TTCAGTGAATCATCGAGTCTTTGAACGCACATTGCGCCCCCTGGTAT  
 TCCGGGGGGCATGCCTGTCCGAGCGTCATTGCTGCCCTCAAGCACG  
 GCTTGTGTGTGGGGCCCCGTCCTCCGATCCCGGGGGACGGGCCCCGA  
 AAGGCAGCGGCGGCACCGCGTCCGGTCCGAGCGTATGGGGCTTT  
 GTCACCCGCTCTGTAGGCCCGGCCGGCGCTTGCCGATCAACCCAAA  
 TTTTATCCAGGTTGACCTCGGATCAGGTAGGGATACCCGCTGAAC  
 TTAAGCATATCAAT

**Figure S2.** Nucleotide sequence (567 bp) encoding the intergenic region of the ribosomal operon from *Penicillium chrysogenum* F-24-28 (ITS1-ITS4 primers).
